# Supplementary material for: Influence of Lavender Essential Oil on the Physical and Antibacterial Properties of Chitosan Sponge for Hemostatic Applications
Source: MDPI journal article supplement (doi:10.3390/ijms242216312), 2023-11-14
Supplement: s1 [file s1]

## Supplementary Material

The following is the supplementary data related to this article.

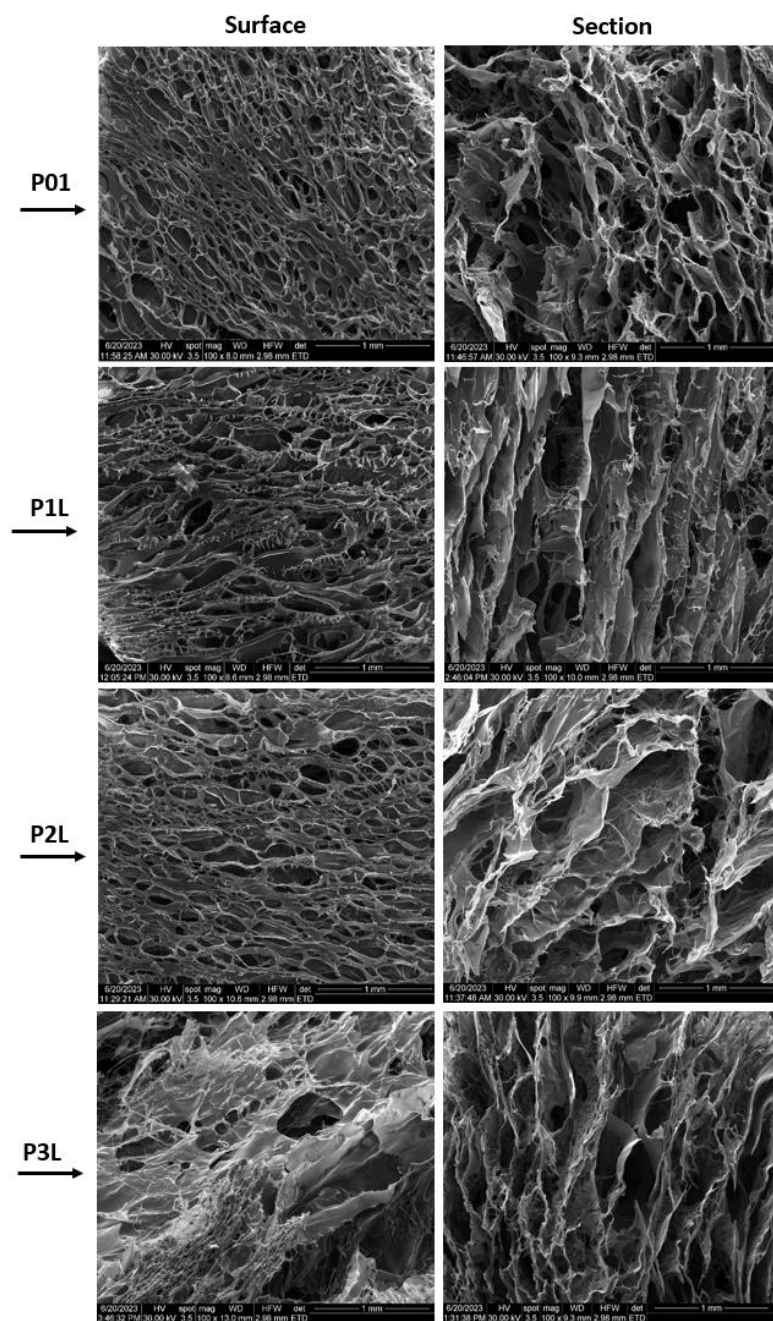

Figure S1. SEM micrographs of samples P01-P3L (100x magnification): surface and section of samples

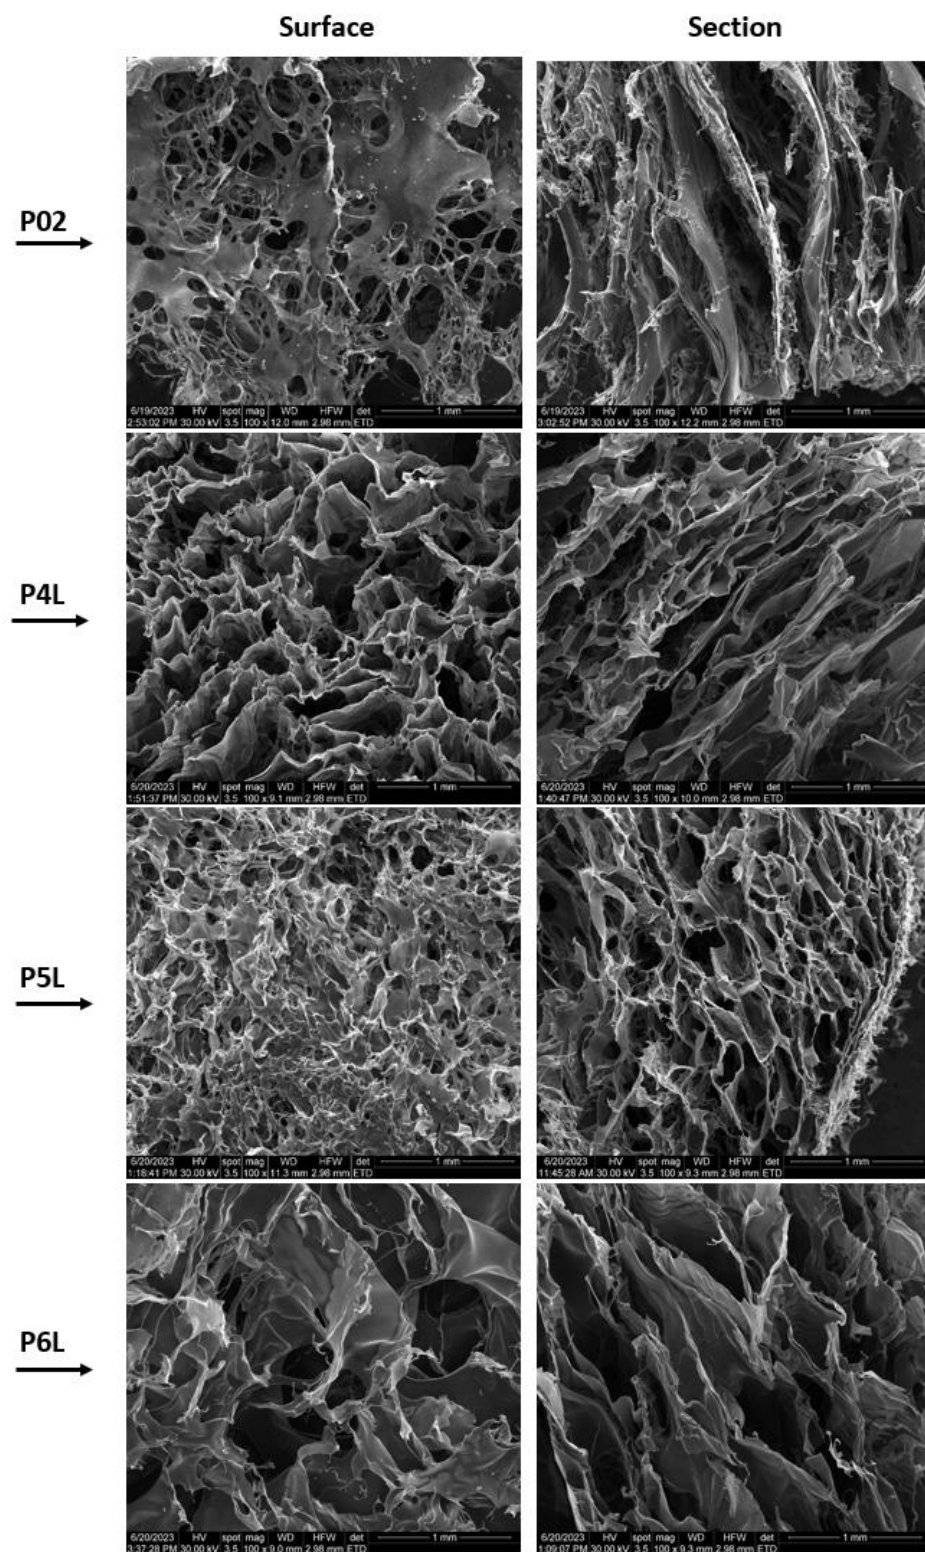

Figure S2. SEM micrographs of samples P02-P6L (100x magnification): surface and section of samples
